# Supplementary material
Source: PubMed Central journal article supplement (PMC9378606)
Supplement: NIHMS1817878-supplement-1.pdf [file NIHMS1817878-supplement-1.pdf]

# Figure S1

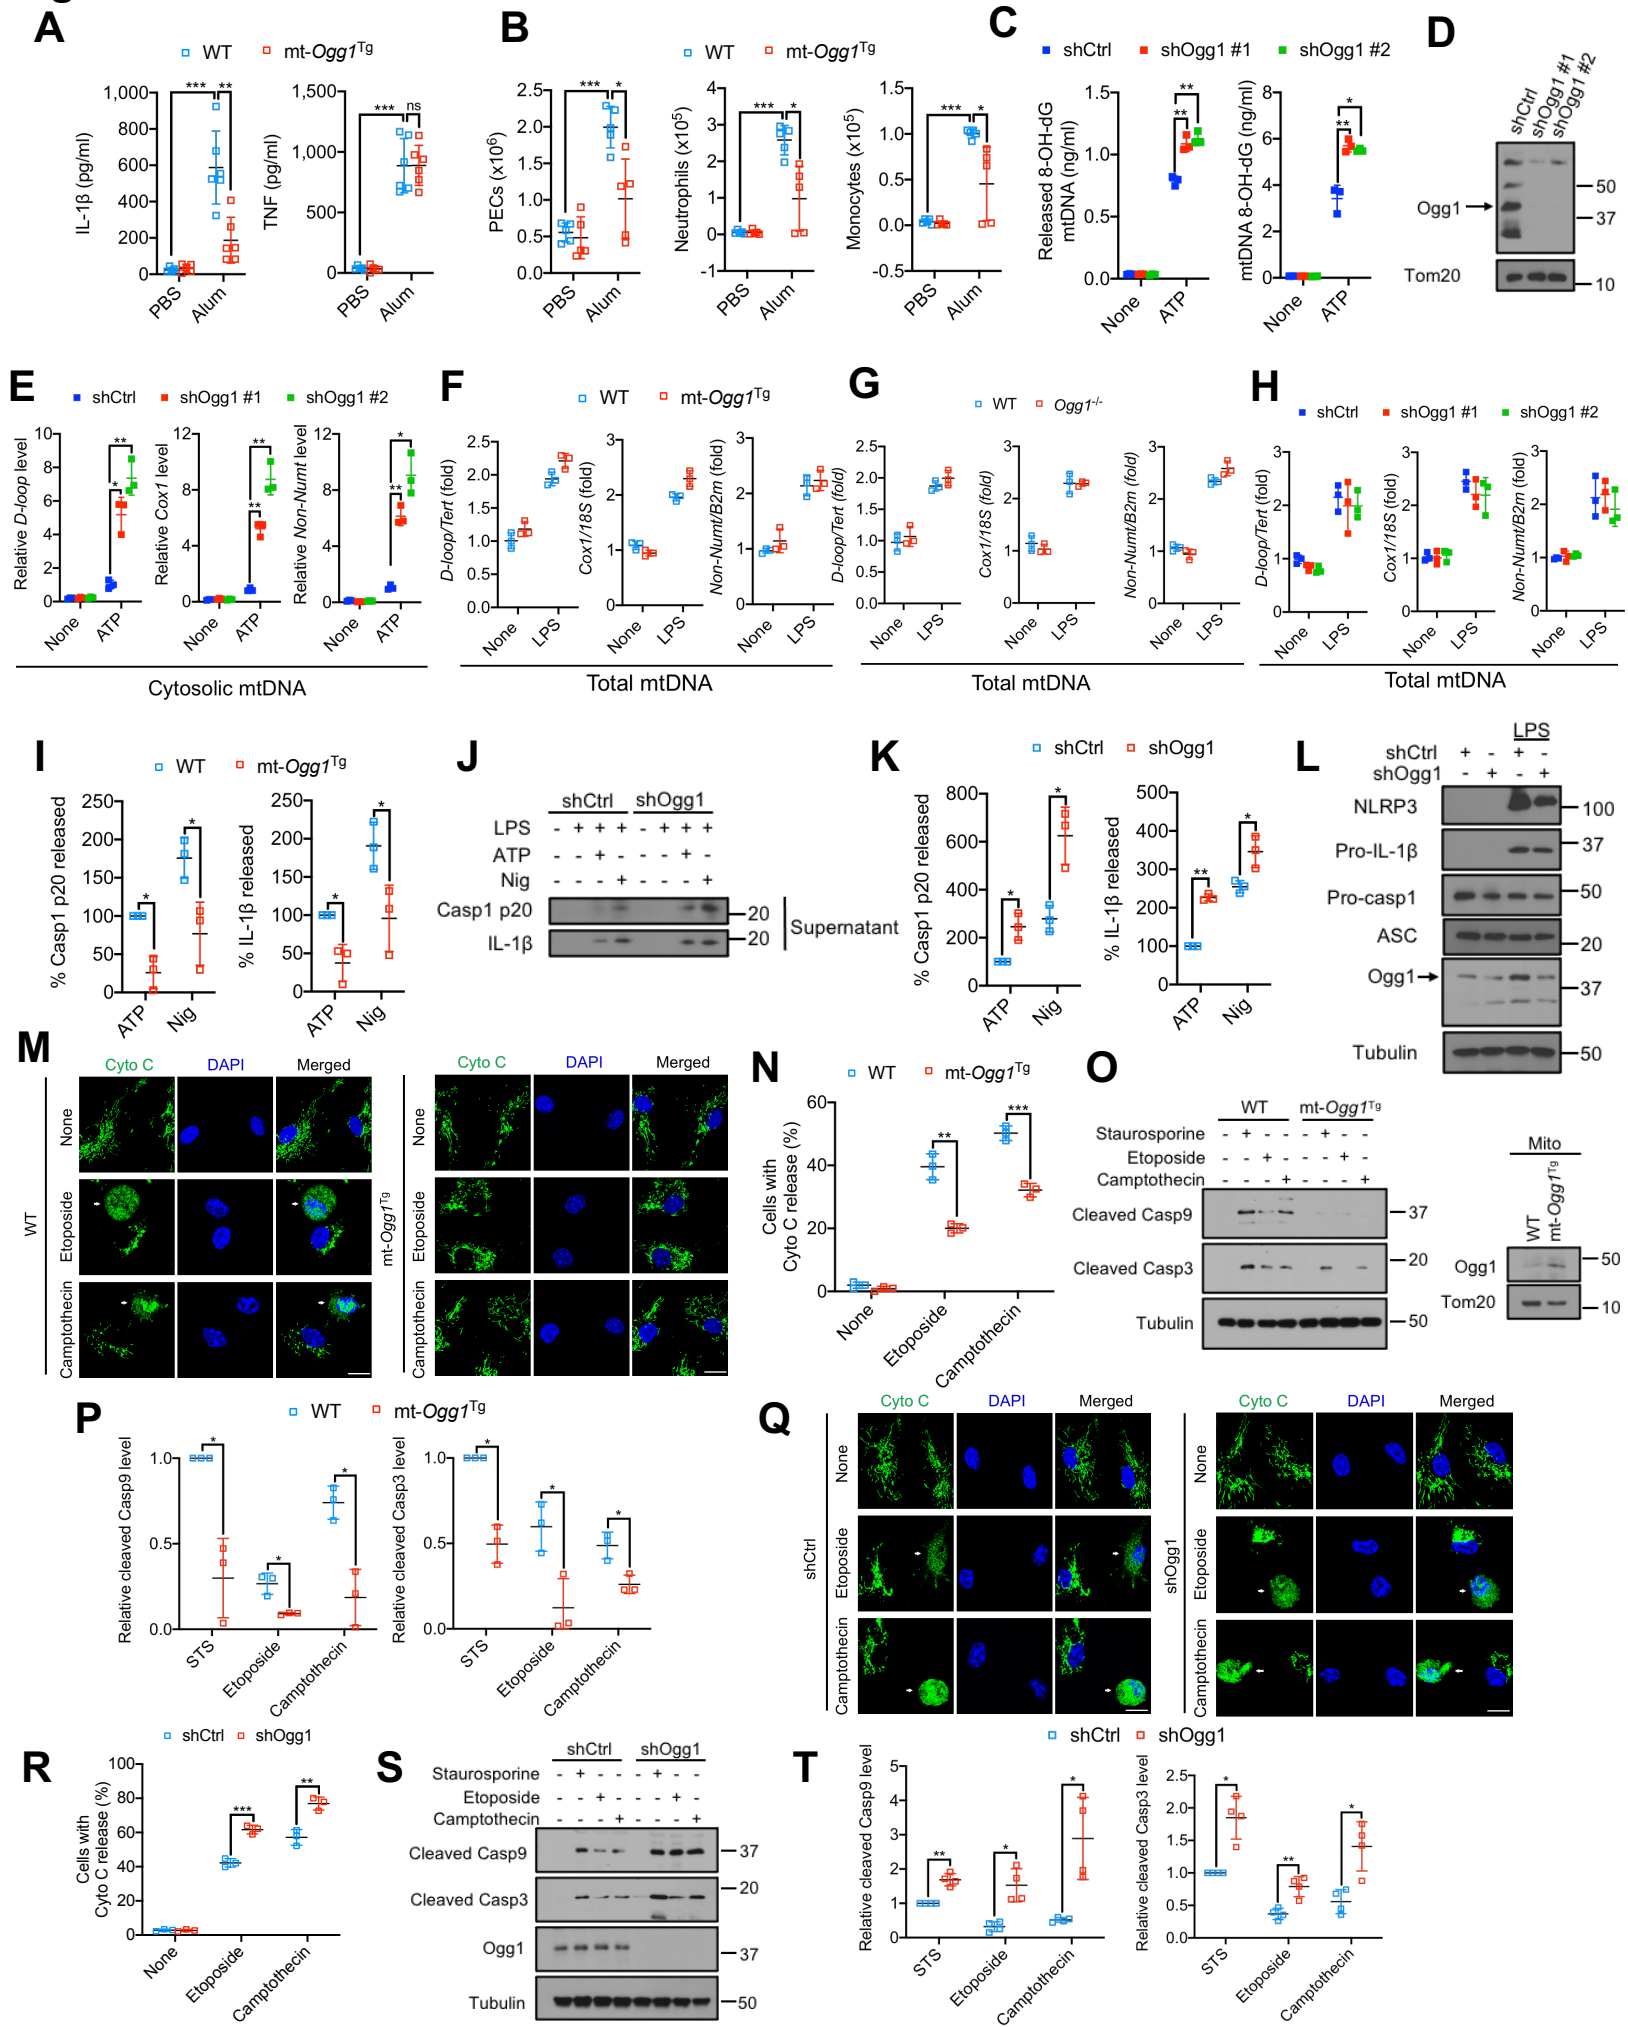

**Figure S1. mt-OGG1 reduces Ox-mtDNA content and restrains NLRP3 inflammasome activation, related to Figure 1.**

(A) Peritoneal IL-1 $\beta$  and TNF in WT or mt-*Ogg*<sup>Tg</sup> mice 4 h after i.p. injection of alum (1 mg) or PBS. Data are mean  $\pm$  s.d. (n=5 in PBS-treated group; n=6 in alum-treated group).

(B) Alum-induced infiltration of peritoneal exudate cells (PEC), neutrophils (CD11b<sup>+</sup>Ly6G<sup>+</sup>F4/80<sup>-</sup>) and monocytes (CD11b<sup>+</sup>Ly6C<sup>+</sup>Ly6G<sup>-</sup>) in WT and mt-*Ogg*<sup>Tg</sup> mice 16 h after alum (300  $\mu$ g) or PBS injection. Data are mean  $\pm$  s.d. (n=5 for each group).

(C) 8-OH-dG amounts in mtDNA from cytosol (left) and mitochondria (right) of LPS-primed BMDM transduced with *Ogg1* (sh*Ogg1* #1 and sh*Ogg1* #2) or control (shCtrl) shRNA, before and after ATP stimulation.

(D) IB analysis of OGG1 and Tom20 in mitochondria isolated from shCtrl- or sh*Ogg1* RNA-transduced BMDM.

(E) Relative cytosolic mtDNA amounts in BMDM treated as (C).

(F-H) Relative total mtDNA amounts in WT and mt-*Ogg*<sup>Tg</sup> (F), WT and *Ogg1*<sup>-/-</sup> (G) or shCtrl- and sh*Ogg1* RNA-transduced BMDM (H), before and after LPS priming. The ratios of *D-loop* mtDNA to *Tert* nDNA, *Cox1* mtDNA to *18S* nDNA, or mtDNA that is not inserted into nuclear DNA (*non-NUMT*) to *B2m* nDNA are shown.

(I) Relative Casp1 p20 and IL-1 $\beta$  in culture supernatants of WT and mt-*Ogg*<sup>Tg</sup> BMDM treated as in Figure 1I.

(J) IB analysis of Casp1 p20 and IL-1 $\beta$  in culture supernatants of shCtrl- or sh*Ogg1* RNA-transduced BMDM treated as indicated.

(K) Relative Casp1 p20 and IL-1 $\beta$  in supernatants of BMDM shown in (J).

(L) IB analysis of NLRP3, pro-IL-1 $\beta$ , pro-caspase-1, ASC and *Ogg1* in shCtrl- and sh*Ogg1* RNA-transduced BMDM, before and after LPS priming. Tubulin is loading control.

(M) Representative fluorescent microscopy of WT or mt-*Ogg1*<sup>Tg</sup> BMDM incubated -/+ etoposide (10  $\mu$ M) or camptothecin (10  $\mu$ M) for 16 h and stained for cytochrome c (Cyto C). Arrows indicate Cyto C release. Scale bar, 5  $\mu$ m.

(N) Percentages of cells in (M) with Cyto C release. n=150 cells per group from 3 independent experiments.

(O) IB analysis of cleaved caspase 9 (Casp9) and cleaved caspase 3 (Casp3) in lysates of WT and mt-*Ogg*<sup>Tg</sup> BMDM incubated -/+ staurosporine (STS, 100 nM), etoposide (10  $\mu$ M) or camptothecin (10  $\mu$ M) for 16 h (left). Mitochondrial OGG1 IB in WT and mt-*Ogg*<sup>Tg</sup> BMDM (right).

(P) Relative amounts of cleaved Casp9 and Casp3 of BMDM shown in (O).

(Q) Representative fluorescent microscopy of shCtrl- and sh*Ogg1* RNA-transduced BMDM treated as in (M) stained for Cyto C. Arrows indicate Cyto C release. Scale bar, 5  $\mu$ m.

(R) Percentages of cells from (Q) with Cyto C release. n=150 cells per group from 3 independent experiments.

(S) IB analysis of cleaved Casp9 and Casp3 in lysates of shCtrl- and sh*Ogg1* RNA-transduced BMDM treated as in (O).

(T) Relative amounts of cleaved Casp9 and Casp3 in BMDM shown in (S).

All IBs show one representative out of 3. Results in (C, E-I, K, N, P, R and T) are mean  $\pm$  s.d. (n=3). \*p<0.05; \*\*p<0.01; \*\*\*p<0.001. ns, not significant. Two-sided unpaired t-test.

# Figure S2

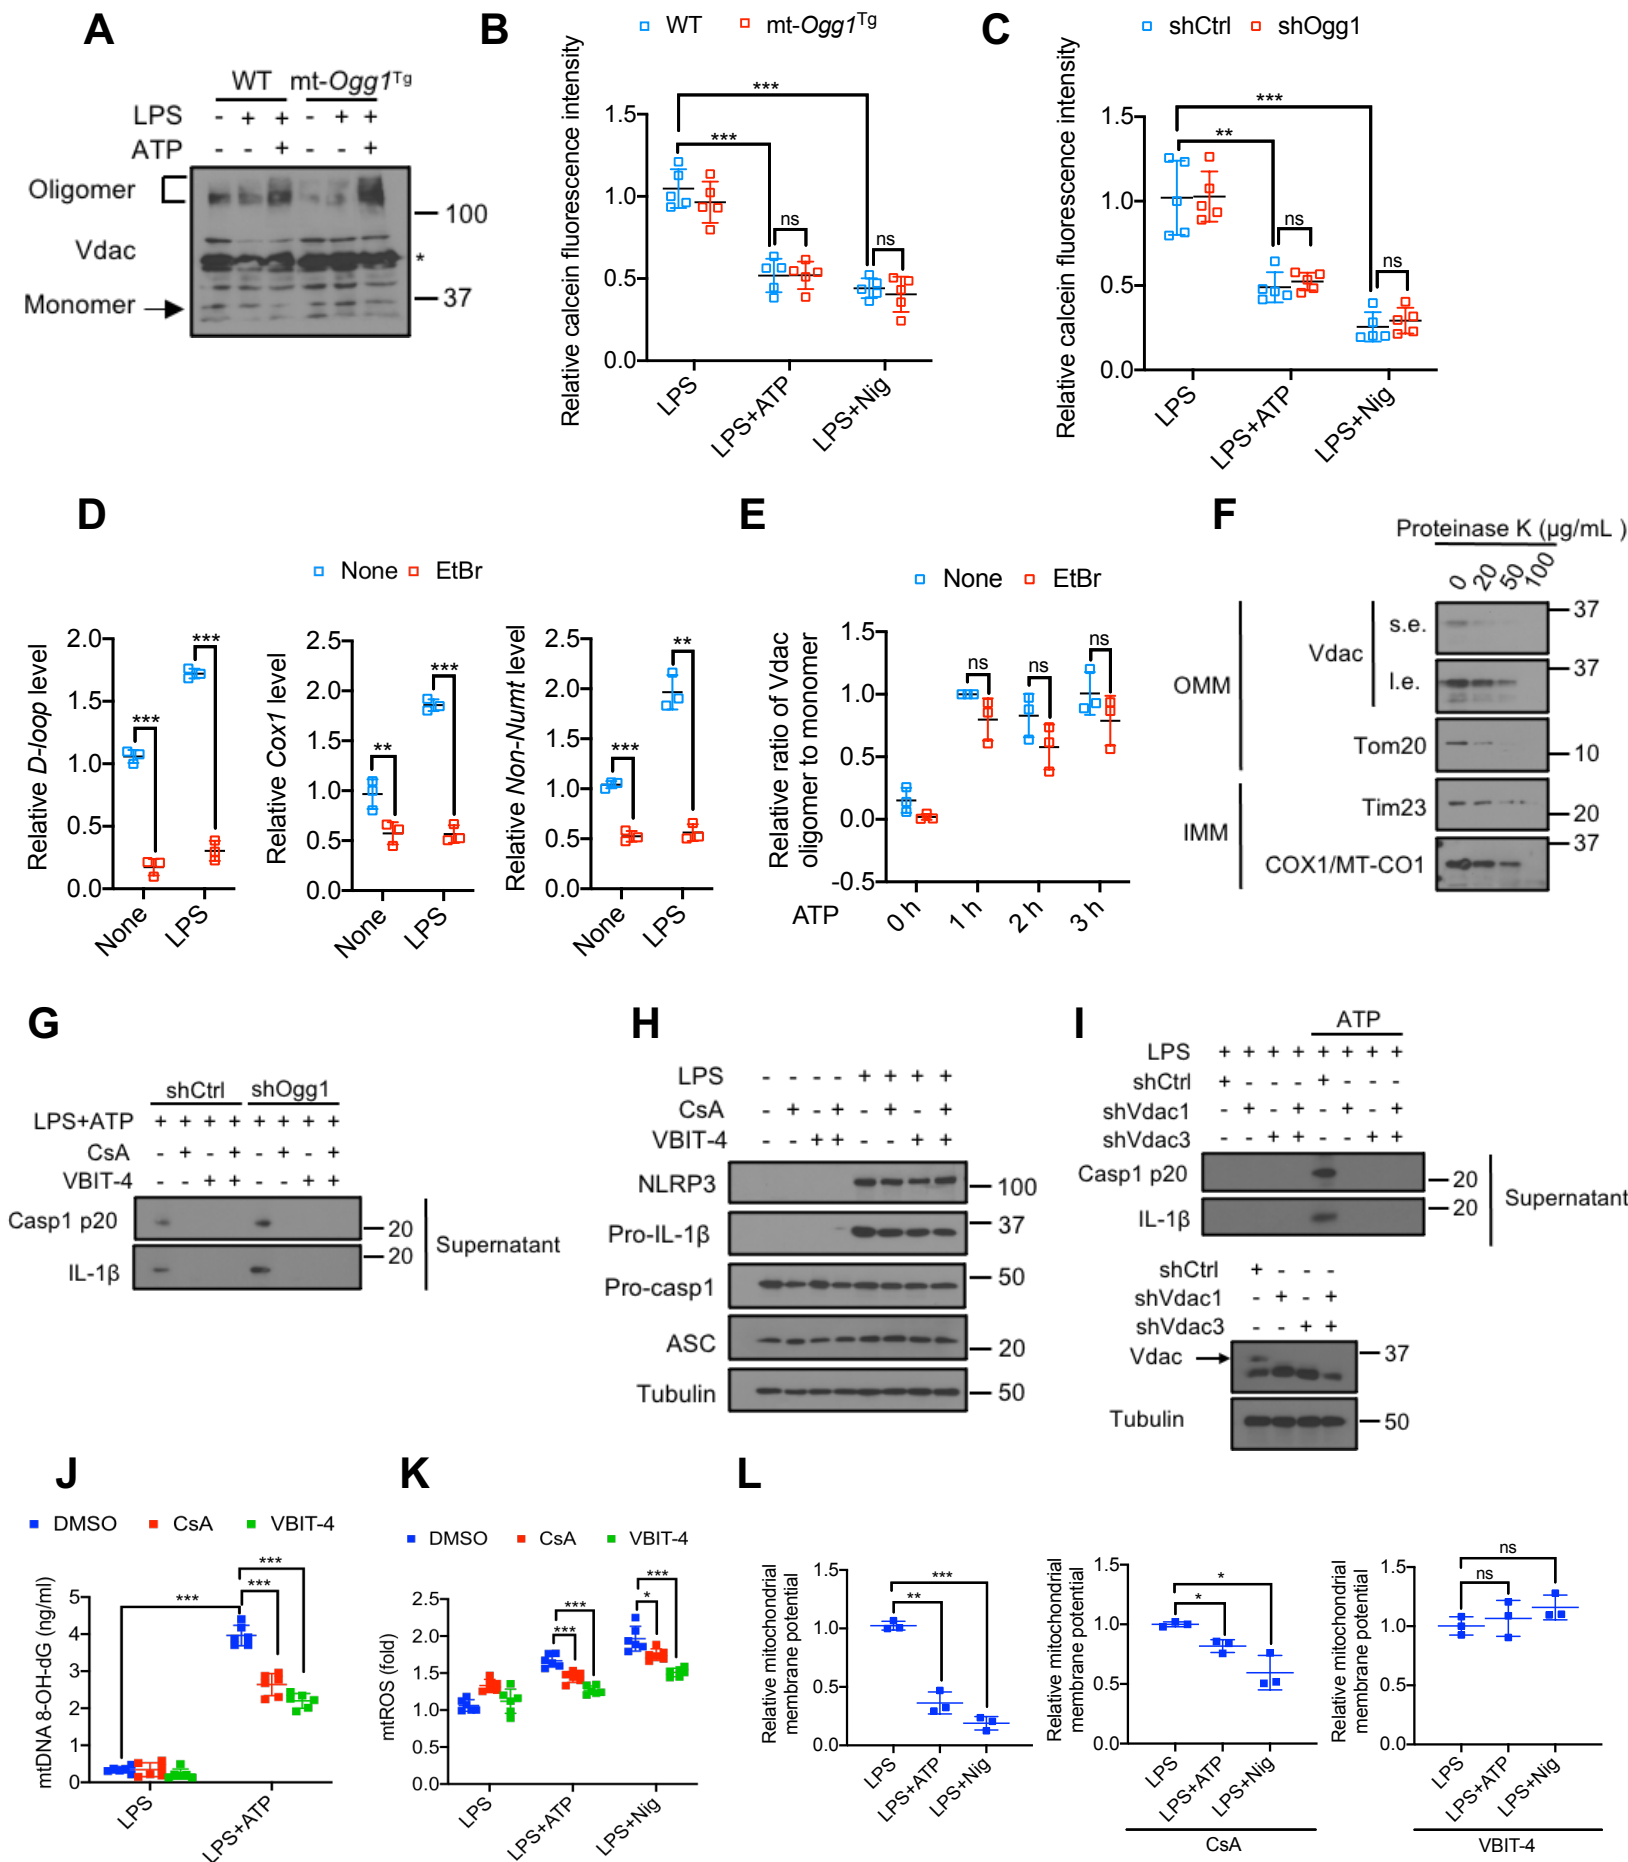

**Figure S2. CsA and VBIT-4 restrict NLRP3 inflammasome activation, related to Figure 2**

- (A) VDAC oligomerization in WT or mt-*Ogg1*<sup>T9</sup> BMDM that were primed -/+ LPS and stimulated -/+ ATP was analyzed as in Figure 2A. Asterisk indicates nonspecific band.
- (B and C) Relative calcein fluorescent intensity in LPS-primed WT and mt-*Ogg1*<sup>T9</sup> (B) or shCtrl- or shOgg1 RNA-transduced (C) BMDM stimulated -/+ ATP or nigericin, using the calcein-quenching assay for mPTP opening (n=5).
- (D) Relative mtDNA amounts in BMDM from Figure 2E, before or after LPS priming, demonstrating the efficacy of mtDNA depletion by EtBr.
- (E) Relative VDAC oligomerization in BMDM from Figure 2E (n=3).
- (F) Mitochondria isolated from BMDM were digested with the indicated concentrations of proteinase K for 30 min on ice and IB analyzed with antibodies against the OMM proteins VDAC and Tom20 and the IMM proteins Tim23 and COX1/MT-CO1.
- (G) IB analysis of Casp1 p20 and IL-1 $\beta$  in supernatants of shCtrl- or shOgg1 RNA-transduced BMDM that were LPS primed and challenged with ATP, -/+ CsA (1  $\mu$ M, 16 h) or VBIT-4 (10  $\mu$ M, 16 h) pretreatment.
- (H) IB analysis of NLRP3, pro-IL-1 $\beta$ , pro-caspase-1, ASC, and tubulin in lysates of BMDM before and after LPS priming, -/+ CsA or VBIT-4 pretreatment as above.
- (I) IB analysis of Casp1 p20 and IL-1 $\beta$  in supernatants of LPS-primed BMDM transduced with shCtrl, shVdac1, shVdac3, or shVdac1 plus shVdac3 RNA, -/+ ATP stimulation (top) and validation of VDAC silencing (bottom).
- (J) 8-OH-dG amounts in mtDNA from mitochondria of LPS-primed BMDM pretreated -/+ CsA (1  $\mu$ M, 16 h) or VBIT-4 (1  $\mu$ M, 16 h), before and after ATP stimulation (n=6).
- (K) Relative mtROS amounts in LPS-primed BMDM pretreated -/+ CsA or VBIT-4 as above and challenged with ATP or nigericin (n=6).
- (L) Mitochondrial membrane potential of BMDM treated as in (K) (n=3).

All IBs show one representative out of 3. Results in (B-E and J-L) are mean  $\pm$  s.d.. \*p<0.05; \*\*p<0.01; \*\*\*p<0.001. ns, not significant.

Two-sided unpaired t-test.

# Figure S3

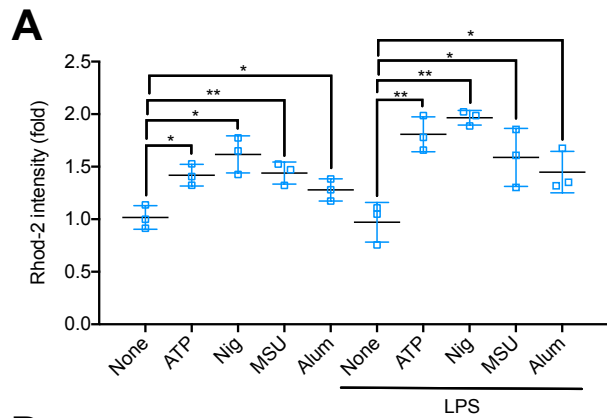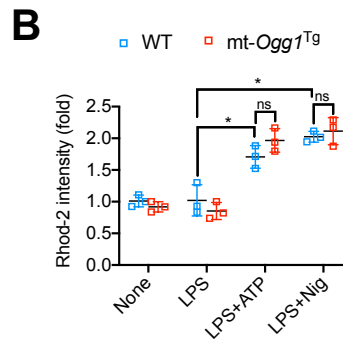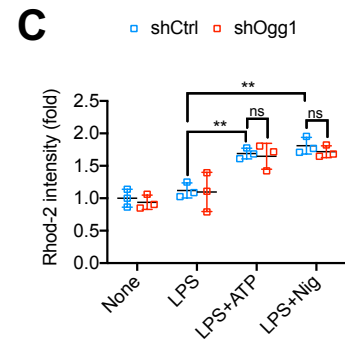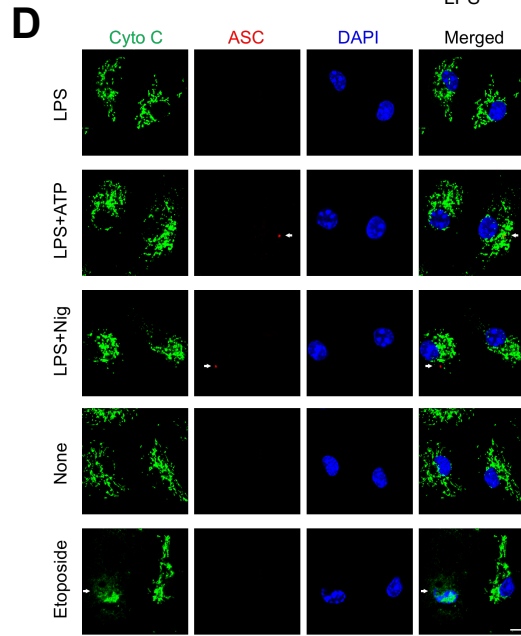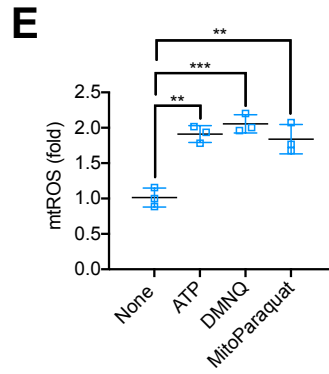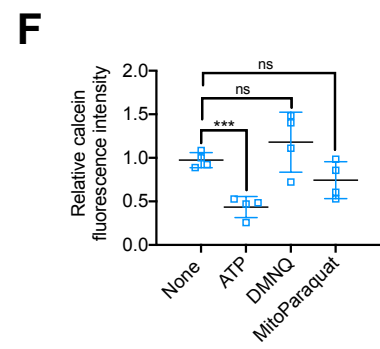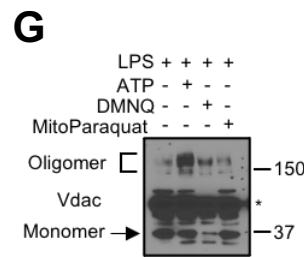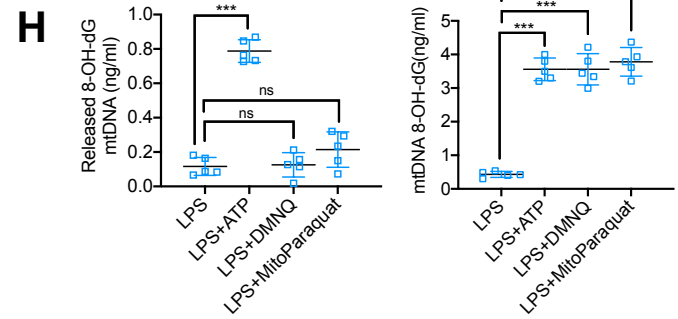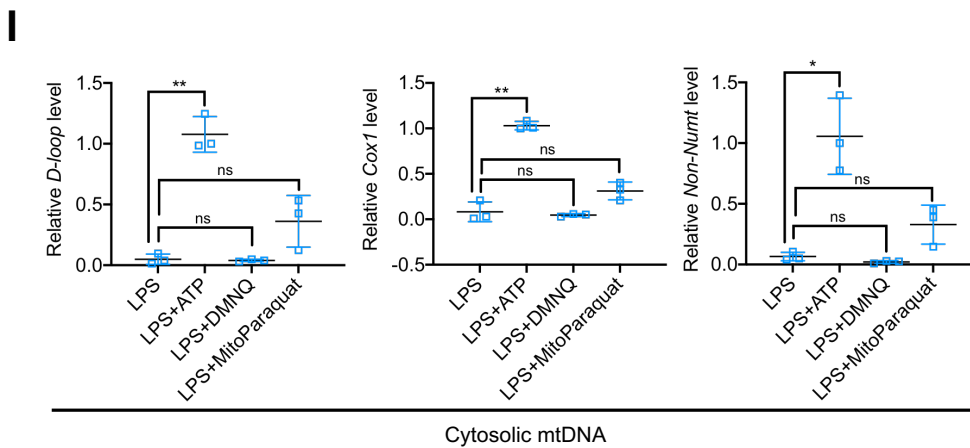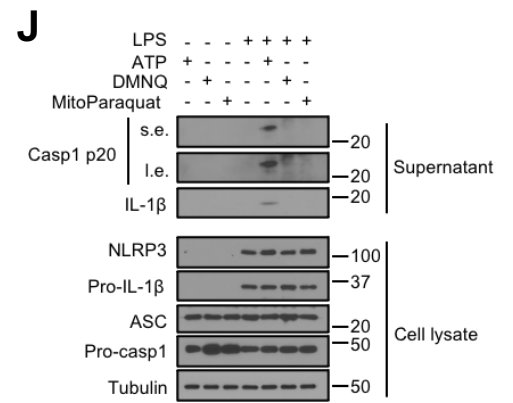

**Figure S3. mtROS alone do not induce channel opening and consequent mtDNA release and apoptosis is not involved either, related to Figure 3**

(A) Relative Rhod-2 fluorescent intensity in BMDM that were challenged with different NLRP3 agonists, +/- LPS priming (n=3).

(B and C) Relative Rhod-2 fluorescent intensity in WT and mt-*Ogg*<sup>Tg</sup> (B) or shCtrl and shOgg1 transduced (C) BMDM before and after LPS priming, +/- ATP or nigericin stimulation (n=3).

(D) Representative fluorescent microscopy images of LPS-primed BMDM +/- ATP or nigericin stimulation that were co-stained for cytochrome c (Cyto C) and ASC. DAPI stains nuclei. BMDM treated with etoposide were used as a positive control for Cyto C release. Arrows indicate ASC specks or Cyto C release. Scale bar, 5  $\mu$ m.

(E and F) Relative mtROS amounts (n=3) (E) and calcein fluorescent intensity (n=4) (F) in LPS-primed BMDM treated with ATP or the ROS generators DMNQ (20  $\mu$ M, 16 h) and MitoParaquat (5  $\mu$ M, 1 h).

(G) VDAC oligomerization in BMDM treated as in (E) was IB analyzed as in Figure S2A. Asterisk indicates nonspecific band.

(H) 8-OH-dG amounts in cytosolic (left) or mitochondrial (right) mtDNA in LPS-primed BMDM treated as in (E) (n=5).

(I) Relative cytosolic mtDNA in BMDM treated as in (H) (n=3).

(J) IB analysis of Casp1 p20 and IL-1 $\beta$  in supernatants and NLRP3, pro-IL-1 $\beta$ , ASC, pro-caspase-1, and tubulin in lysates of BMDM +/- LPS priming, followed by ATP, DMNQ or MitoParaquat treatment as above.

All IBs show one representative out of 3. Results in (A-C, E, F, H and I) are mean  $\pm$  s.d.. \*p<0.05; \*\*p<0.01; \*\*\*p<0.001. ns, not significant. Two-sided unpaired t-test.

# Figure S4

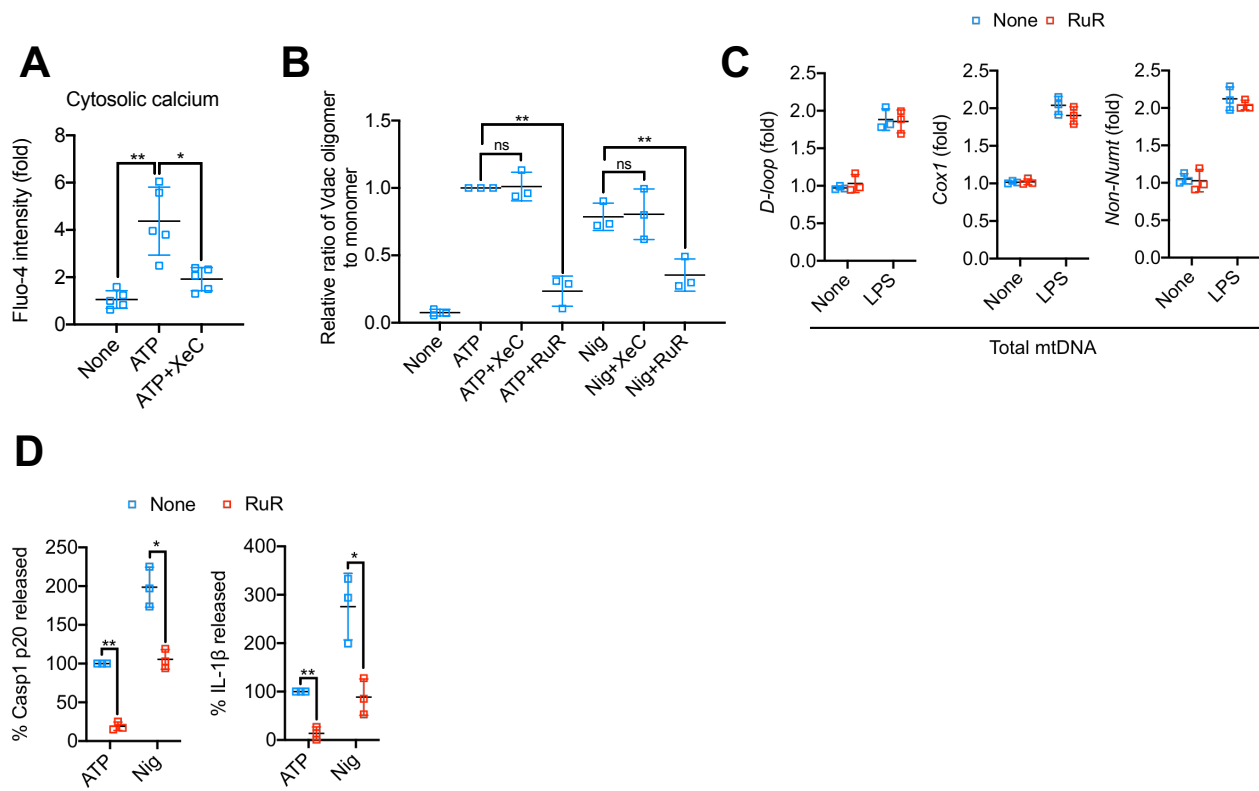

**Figure S4. MCU inhibitor blunts mPTP-VDAC channel opening and NLRP3 inflammasome activation, related to Figure 4**

(A) Relative Fluo-4 fluorescent intensity of BMDM pretreated +/- XeC (5  $\mu$ M, 16 h) and challenged with ATP (n=5).

(B) Relative VDAC oligomerization in the BMDM from Figure 4C (n=3).

(C) Relative mtDNA amounts in BMDM pretreated +/- RuR (10  $\mu$ M, 16 h) before and after LPS priming (n=3).

(D) Relative Casp1 p20 and IL-1 $\beta$  in supernatants of BMDM from Figure 4F (n=3).

Results are mean  $\pm$  s.d.. \* $p$ <0.05; \*\* $p$ <0.01. ns, not significant. Two-sided unpaired t-test.

# Figure S5

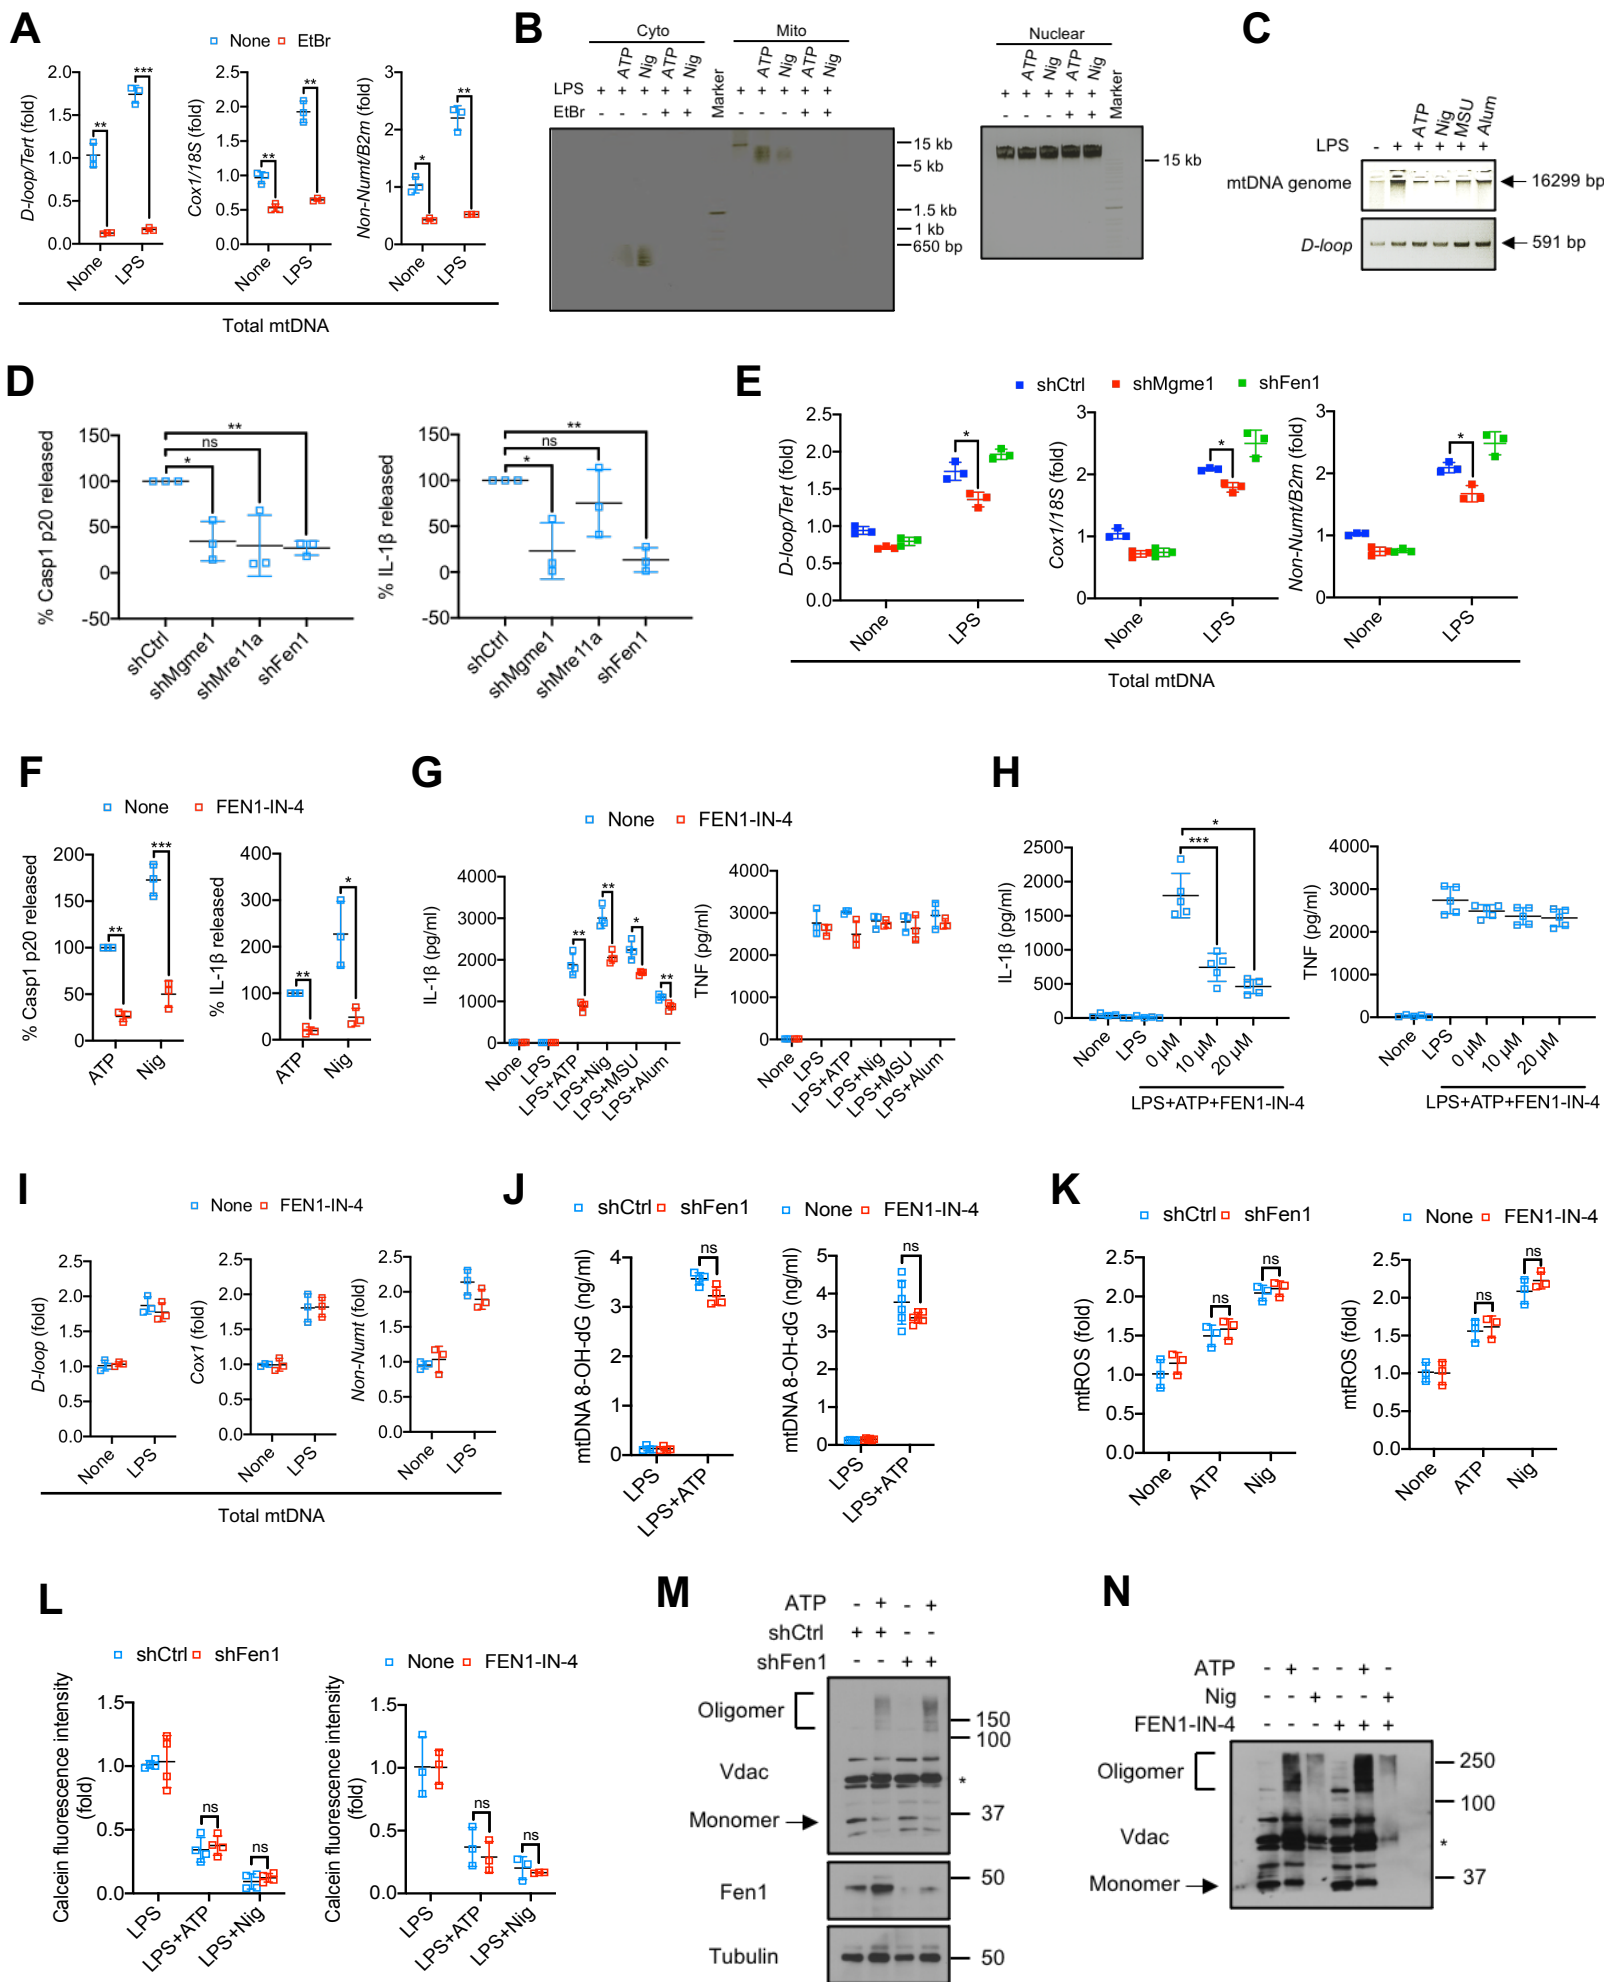



**Figure S5. Mgme1 is needed for mtDNA synthesis but FEN1 has no impact on total mtDNA content, Ox-mtDNA generation and pore opening, related to Figure 5**

(A) Relative mtDNA amounts in BMDM pretreated +/- EtBr (450 ng/mL, 4 days) before or after LPS priming.

(B) Analysis of DNA in the cytosolic (Cyto), mitochondrial (Mito), or nuclear fractions of LPS-primed BMDM pretreated +/- EtBr (450 ng/mL, 4 days), followed by ATP or nigericin stimulation. The agarose gel is representative of 3 independent experiments.

(C) PCR products generated by amplification of mtDNA (entire genome, 16299 bp or *D-loop* region, 591 bp) from BMDM before or after LPS priming, followed by stimulation with different NLRP3 activators.

(D) Relative Casp1 p20 and IL-1b in supernatants of BMDM from Figure 5C.

(E) Relative mtDNA amounts in shCtrl, shMgme1, or shFen1 transduced BMDM +/- LPS priming.

(F) Relative Casp1 p20 and IL-1b in supernatants of BMDM from Figure 5M.

(G) IL-1 $\beta$  and TNF secretion by BMDM pretreated +/- FEN1-IN-4 (10  $\mu$ M, 16 h), primed +/- LPS, and stimulated with different NLRP3 activators (n=3).

(H) IL-1 $\beta$  and TNF secretion by BMDM pretreated +/- FEN1-IN-4 (10  $\mu$ M or 20  $\mu$ M, 16 h), primed +/- LPS, followed by ATP challenge (n=3).

(I) Relative mtDNA amounts in BMDM pretreated +/- FEN1-IN-4 (10  $\mu$ M, 16 h), before or after LPS priming (n=3).

(J and K) 8-OH-dG content of mtDNA from mitochondria (J) and relative mtROS amounts (K) in LPS-primed BMDM transduced with Fen1 (shFen1) or control (shCtrl) shRNA (left) or pretreated +/- FEN1-IN-4 (10  $\mu$ M, 16 h) (right), and stimulated +/- ATP or nigericin (n=3-6).

(L) Calcein fluorescent intensity of LPS-primed BMDM treated as in (K) (n=3).

(M and N) VDAC oligomerization in LPS-primed BMDM transduced with shFen1 or shCtrl RNA (M) or pretreated +/- FEN1-IN-4 (10  $\mu$ M, 16 h) (N), and stimulated +/- ATP or nigericin, was IB analyzed as in Figure S2A. Asterisk indicates nonspecific band.

The agarose gel in (B and C) is representative of 3 independent experiments. Results in (A and D-L) are mean  $\pm$  s.d. \*p<0.05; \*\*p<0.01; \*\*\*p<0.001. ns, not significant. Two-sided unpaired t-test.

# Figure S6

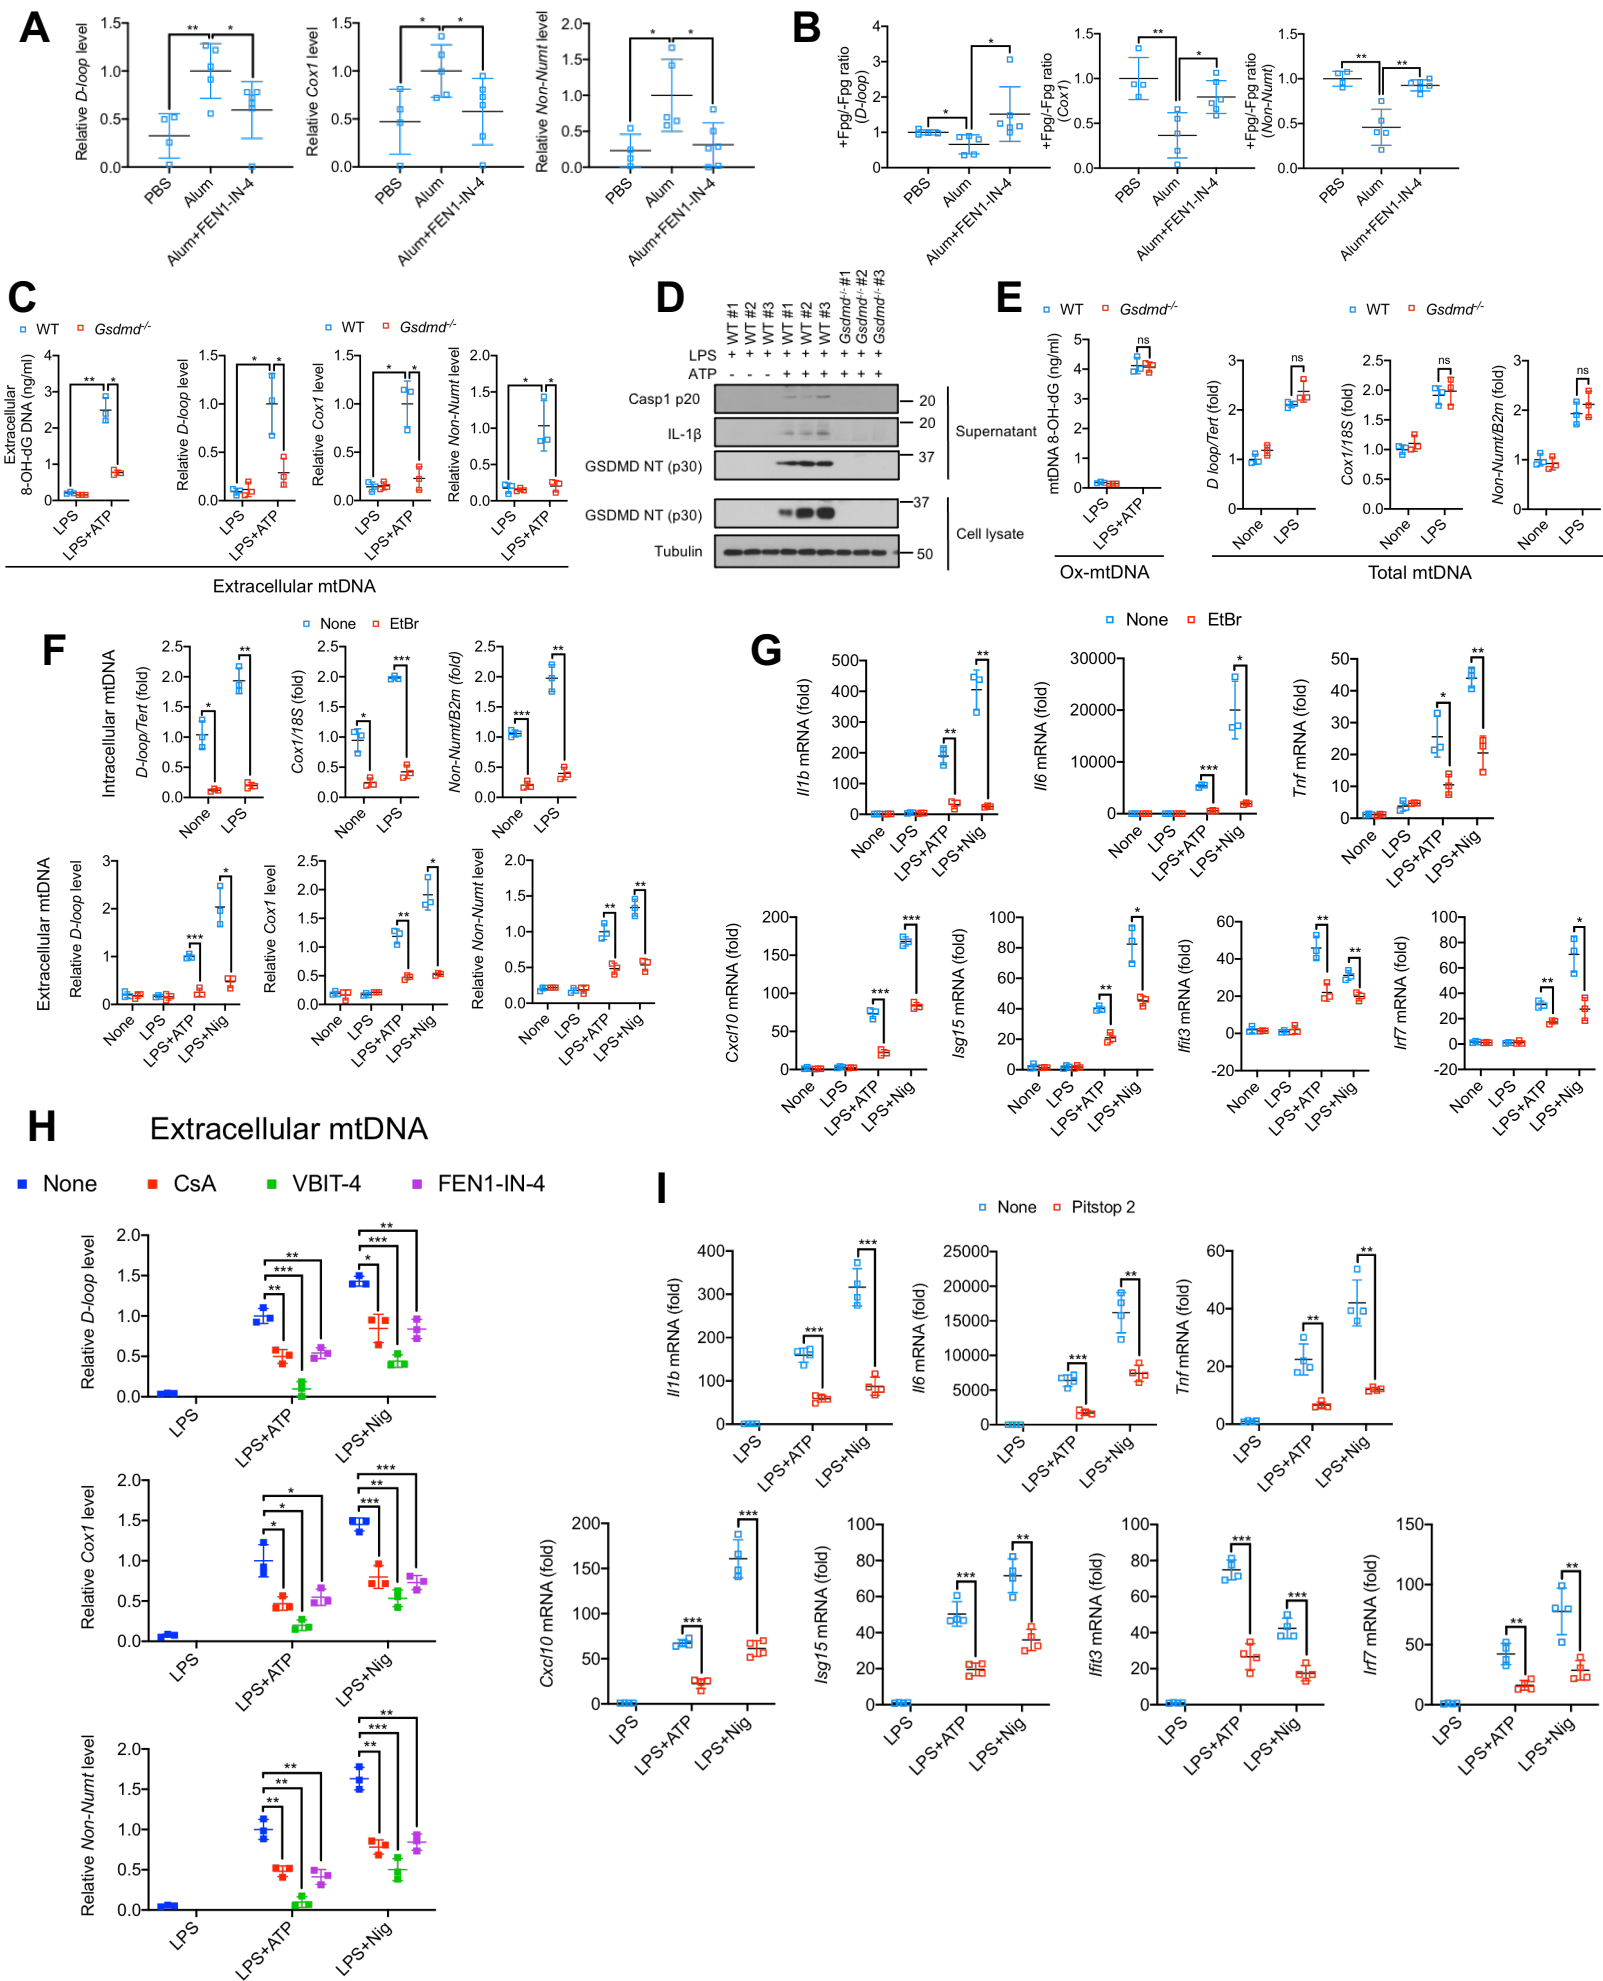

**Figure S6. Immunostimulatory cell-free Ox-mtDNA secretes via pyroptosis and is up-taken by stander cells through endocytosis, related to Figure 6**

(A and B) Relative ccf-mtDNA amounts (A) and the ratio of Fpg-treated (+) to nontreated (-) mtDNA, indicating the fraction of cell-free non-Ox-mtDNA (Fpg-resistant) relative to total secreted mtDNA (B) in peritoneal exudates from Figure 5O (n=4-5 for PBS- and alum-treated groups; n=6 for alum+FEN1-IN-4-treated group).

(C) Relative amounts of extracellular Ox-mtDNA (left) or mtDNA in LPS-primed WT and *Gsdmd*<sup>-/-</sup> BMDM stimulated +/- ATP (n=3).

(D) IB analysis of Casp1 p20, IL-1 $\beta$  and cleaved GSDMD [GSDMD NT (p30)] in culture supernatants of LPS-primed WT and *Gsdmd*<sup>-/-</sup> BMDM +/- ATP challenge (n=3)

(E) 8-OH-dG amounts in mtDNA from mitochondria of LPS-primed WT or *Gsdmd*<sup>-/-</sup> BMDM before and after ATP stimulation (left).

Relative total mtDNA amounts in WT and *Gsdmd*<sup>-/-</sup> BMDM, before and after LPS priming (n=3).

(F) Relative amounts of intracellular (top panel) or secreted (bottom panel) mtDNA in BMDM pretreated +/- EtBr (450 ng/mL, 4 days), primed +/- LPS and stimulated +/- ATP or nigericin. Intracellular mtDNA content validates effective mtDNA depletion by EtBr (n=3).

(G) qPCR quantitation of *Il1b*, *Il6*, *Tnf*, *Cxcl10*, *Isg15*, *Ifit3* and *Irf7* mRNAs in BMDM incubated for 24 h with cell free DNA collected from (F) (n=3).

(H) Relative mtDNA amounts released by LPS-primed BMDM pretreated +/- CsA, VBIT-4 or FEN1-IN-4 as above and challenged with ATP or nigericin (n=3).

(I) qPCR quantitation of *Il1b*, *Il6*, *Tnf*, *Cxcl10*, *Isg15*, *Ifit3* and *Irf7* mRNAs in BMDM +/- Pitstop 2 (2 uM) incubated for 24 h with extracellular DNA collected from LPS-primed donor BMDM stimulated +/- ATP or nigericin (n=4).

Results are mean  $\pm$  s.d.. \*p<0.05; \*\*p<0.01; \*\*\*p<0.001. ns, not significant. Two-sided unpaired t-test.

**Figure S7**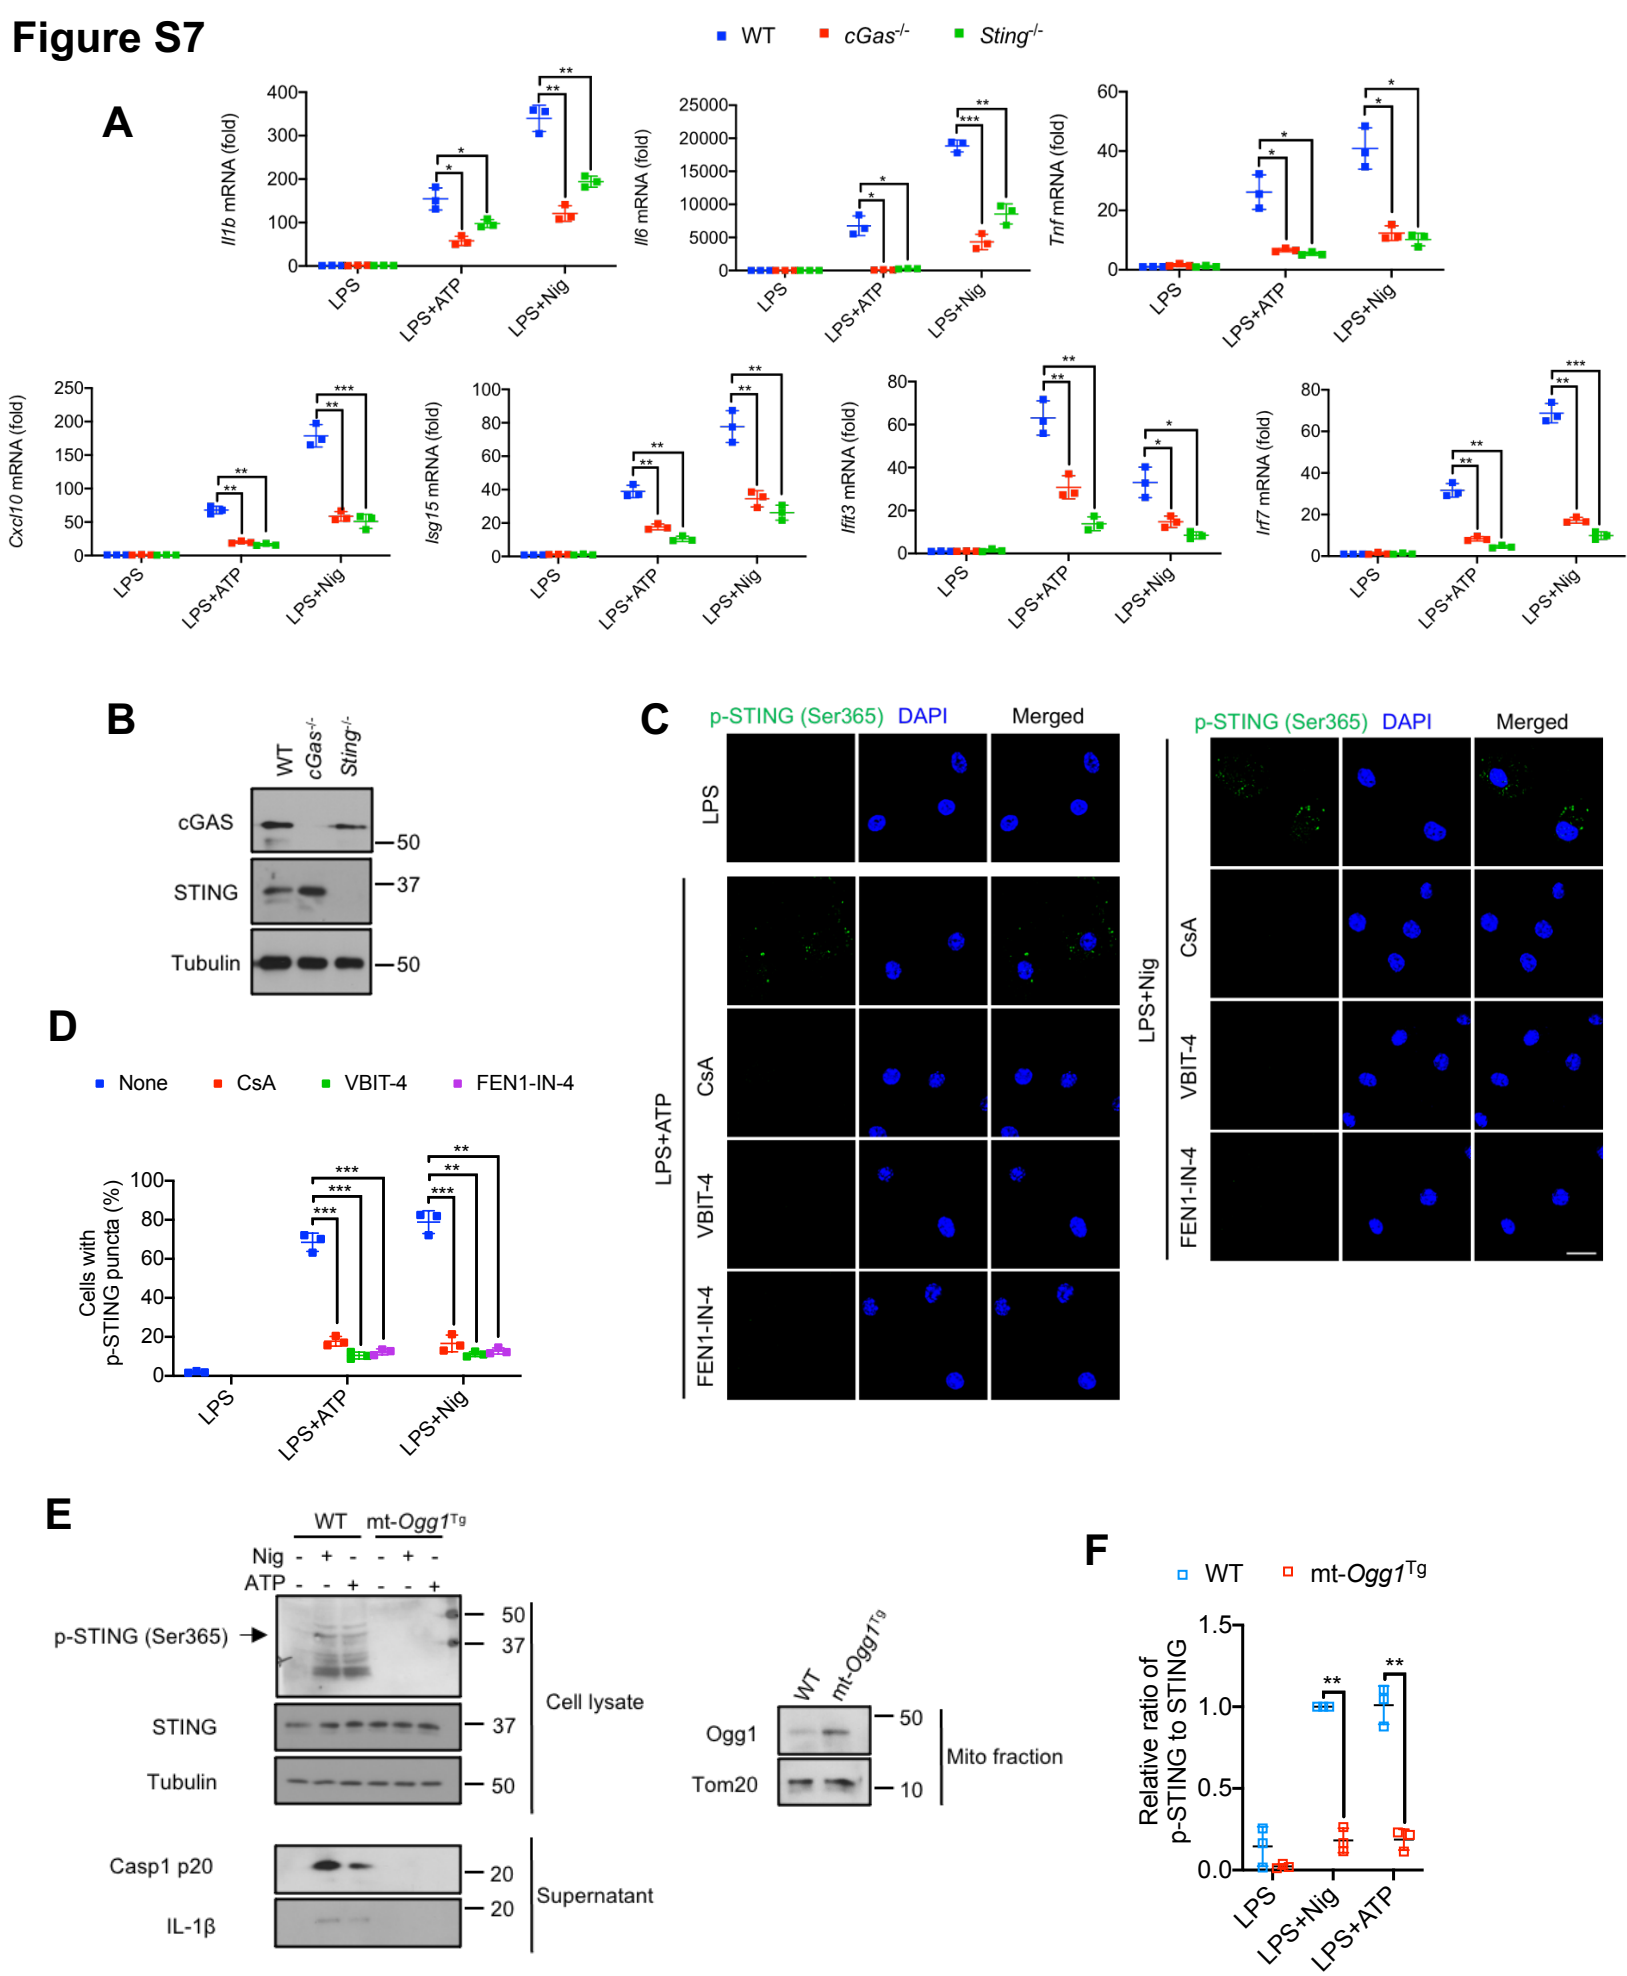

**Figure S7. Induction of mtDNA release by NLRP3 inflammasome activators leads to STING Ser<sup>365</sup> phosphorylation, related to Figure 7**

(A) qPCR quantitation of *Il1b*, *Il6*, *Tnf*, *Cxcl10*, *Isg15*, *Ifit3* and *Irf7* mRNAs in WT, *cGas*<sup>-/-</sup> or *Sting*<sup>-/-</sup> BMDM incubated for 24 h with extracellular DNA collected from LPS-primed donor BMDM stimulated -/+ ATP or nigericin (n=3), showing cGAS-STING dependence.

(B) IB analysis of cGAS and STING in lysates of BMDM as in (A).

(C) Representative fluorescent microscopy images of LPS-primed BMDM pretreated -/+ CsA (1 μM, 16 h), VBIT-4 (10 μM, 16 h) or FEN1-IN-4 (10 μM, 16 h) and stained for p-STING (Ser<sup>365</sup>) before or after ATP or nigericin stimulation. DAPI stains nuclei. Scale bar, 5 μm.

(D) Percentages of cells with p-STING (Ser<sup>365</sup>) puncta from (C). n=150 cells per group were analyzed from 3 independent experiments.

(E) IB analysis of STING Ser<sup>365</sup> phosphorylation in lysates and Casp1 p20 and IL-1β in supernatants of LPS-primed WT or mt-*Ogg1*<sup>Tg</sup> BMDM stimulated -/+ ATP or nigericin (left) (n=3). Mitochondrial OGG1 IB in WT and mt-*Ogg1*<sup>Tg</sup> BMDM (right).

(F) Relative p-STING (Ser<sup>365</sup>) to total STING amounts as indicated in (E).

Results in (A, D and F) are mean ± s.d.. \*p<0.05; \*\*p<0.01; \*\*\*p<0.001. Two-sided unpaired t-test.
